# Supplementary material for: Pan-cancer analysis combined with experiments predicts CTHRC1 as a therapeutic target for human cancers
Source: Cancer Cell Int. 2021 Oct 26;21:566. doi: 10.1186/s12935-021-02266-3 (PMC8549344; doi:10.1186/s12935-021-02266-3)
Supplement: Supplementary file 13 — Additional file 13. CTHRC1 alteration details of cancer type, protein change, mutation type. [file 12935_2021_2266_MOESM13_ESM.xlsx]

## Sheet: table
Study	Sample ID	Cancer Type	Protein Change	Annotation	Functional Impact	Mutation Type	Variant Type	Copy #	COSMIC	Chromosome	Start Pos	End Pos	Ref	Var	HGVSg	HGVSc	Allele Freq (T)	Allele Freq (N)	Variant Reads	Ref Reads	Variant Reads (Normal)	Ref Reads (Normal)	# Mut in Sample	Exon
Uterine Carcinosarcoma (TCGA, PanCancer Atlas)	TCGA-NF-A4X2-01	Uterine Carcinosarcoma/Uterine Malignant Mixed Mullerian Tumor	P81A	OncoKB: NA;CIViC: NA;MyCancerGenome: not present;CancerHotspot: no;3DHotspot: no	MutationAssessor: impact: medium, score: 2.235;SIFT: impact: tolerated, score: 0.12;Polyphen-2: impact: possibly_damaging, score: 0.894	Missense_Mutation	SNP	gain		8	104388056	104388056	C	G	8:g.104388056C>G	ENST00000330295.5:c.241C>G	0.12		18	128		87	89	44231
Glioblastoma Multiforme (TCGA, PanCancer Atlas)	TCGA-06-2559-01	Glioblastoma Multiforme	R146W	OncoKB: NA;CIViC: NA;MyCancerGenome: not present;CancerHotspot: no;3DHotspot: no	MutationAssessor: impact: medium, score: 2.705;SIFT: impact: deleterious, score: 0;Polyphen-2: impact: probably_damaging, score: 0.998	Missense_Mutation	SNP	diploid	1	8	104390318	104390318	C	T	8:g.104390318C>T	ENST00000330295.5:c.436C>T	0.05		16	294		293	53	44259
Glioblastoma Multiforme (TCGA, PanCancer Atlas)	TCGA-06-5416-01	Glioblastoma Multiforme	X51_splice	OncoKB: NA;CIViC: NA;MyCancerGenome: not present;CancerHotspot: no;3DHotspot: no	MutationAssessor: impact: , score: undefined;SIFT: NA;Polyphen-2: NA	Splice_Site	SNP	diploid		8	104387965	104387965	G	A	8:g.104387965G>A	ENST00000330295.5:c.151-1G>A	0.43		138	183		264	12177
Glioblastoma Multiforme (TCGA, PanCancer Atlas)	TCGA-06-5416-01	Glioblastoma Multiforme	R138S	OncoKB: NA;CIViC: NA;MyCancerGenome: not present;CancerHotspot: no;3DHotspot: no	MutationAssessor: impact: medium, score: 2.65;SIFT: impact: deleterious, score: 0;Polyphen-2: impact: possibly_damaging, score: 0.549	Missense_Mutation	SNP	diploid		8	104390296	104390296	A	C	8:g.104390296A>C	ENST00000330295.5:c.414A>C	0.44		161	203		323	12177	44259
Lung Squamous Cell Carcinoma (TCGA, PanCancer Atlas)	TCGA-46-3768-01	Lung Squamous Cell Carcinoma	S187L	OncoKB: NA;CIViC: NA;MyCancerGenome: not present;CancerHotspot: no;3DHotspot: no	MutationAssessor: impact: low, score: 1.89;SIFT: impact: tolerated, score: 0.05;Polyphen-2: impact: benign, score: 0.023	Missense_Mutation	SNP	gain	1	8	104390442	104390442	C	T	8:g.104390442C>T	ENST00000330295.5:c.560C>T	0.14		8	49		51	352	44259
Lung Squamous Cell Carcinoma (TCGA, PanCancer Atlas)	TCGA-52-7812-01	Lung Squamous Cell Carcinoma	L147V	OncoKB: NA;CIViC: NA;MyCancerGenome: not present;CancerHotspot: no;3DHotspot: no	MutationAssessor: impact: low, score: 1.08;SIFT: impact: tolerated, score: 0.56;Polyphen-2: impact: benign, score: 0.1	Missense_Mutation	SNP	gain		8	104390321	104390321	C	G	8:g.104390321C>G	ENST00000330295.5:c.439C>G	0.18		41	186		191	263	44259
Bladder Urothelial Carcinoma (TCGA, PanCancer Atlas)	TCGA-BT-A2LD-01	Bladder Urothelial Carcinoma	S219L	OncoKB: NA;CIViC: NA;MyCancerGenome: not present;CancerHotspot: no;3DHotspot: no	MutationAssessor: impact: low, score: 1.39;SIFT: impact: deleterious, score: 0.05;Polyphen-2: impact: benign, score: 0.026	Missense_Mutation	SNP	gain	1	8	104394752	104394752	C	T	8:g.104394752C>T	ENST00000330295.5:c.656C>T	0.09		13	127		198	96	44290
Bladder Urothelial Carcinoma (TCGA, PanCancer Atlas)	TCGA-GC-A3RD-01	Bladder Urothelial Carcinoma	W102*	OncoKB: NA;CIViC: NA;MyCancerGenome: not present;CancerHotspot: no;3DHotspot: no	MutationAssessor: NA;SIFT: NA;Polyphen-2: NA	Nonsense_Mutation	SNP	gain	1	8	104388121	104388121	G	A	8:g.104388121G>A	ENST00000330295.5:c.306G>A	0.13		10	65		65	75	44231
Bladder Urothelial Carcinoma (TCGA, PanCancer Atlas)	TCGA-K4-A5RI-01	Bladder Urothelial Carcinoma	E99Q	OncoKB: NA;CIViC: NA;MyCancerGenome: not present;CancerHotspot: no;3DHotspot: no	MutationAssessor: impact: medium, score: 1.95;SIFT: impact: tolerated, score: 0.17;Polyphen-2: impact: probably_damaging, score: 0.979	Missense_Mutation	SNP	gain		8	104388110	104388110	G	C	8:g.104388110G>C	ENST00000330295.5:c.295G>C	0.19		13	56		52	122	44231
Bladder Urothelial Carcinoma (TCGA, PanCancer Atlas)	TCGA-XF-A9T3-01	Bladder Urothelial Carcinoma	A174S	OncoKB: NA;CIViC: NA;MyCancerGenome: not present;CancerHotspot: no;3DHotspot: no	MutationAssessor: impact: neutral, score: 0.235;SIFT: impact: tolerated, score: 0.34;Polyphen-2: impact: benign, score: 0	Missense_Mutation	SNP	gain		8	104390402	104390402	G	T	8:g.104390402G>T	ENST00000330295.5:c.520G>T	0.28	0.01	26	67	1	87	361	44259
Bladder Urothelial Carcinoma (TCGA, PanCancer Atlas)	TCGA-KQ-A41N-01	Bladder Urothelial Carcinoma	H192N	OncoKB: NA;CIViC: NA;MyCancerGenome: not present;CancerHotspot: no;3DHotspot: no	MutationAssessor: impact: medium, score: 2.74;SIFT: impact: deleterious, score: 0;Polyphen-2: impact: probably_damaging, score: 0.98	Missense_Mutation	SNP	gain		8	104390456	104390456	C	A	8:g.104390456C>A	ENST00000330295.5:c.574C>A	0.15		9	51		31	2528	44259
Bladder Urothelial Carcinoma (TCGA, PanCancer Atlas)	TCGA-UY-A78N-01	Bladder Urothelial Carcinoma	S110*	OncoKB: NA;CIViC: NA;MyCancerGenome: not present;CancerHotspot: no;3DHotspot: no	MutationAssessor: NA;SIFT: NA;Polyphen-2: NA	Nonsense_Mutation	SNP	gain		8	104388144	104388144	C	A	8:g.104388144C>A	ENST00000330295.5:c.329C>A	0.09		3	32		36	266	44231
Liver Hepatocellular Carcinoma (TCGA, PanCancer Atlas)	TCGA-MI-A75G-01	Hepatocellular Carcinoma	Q44R	OncoKB: NA;CIViC: NA;MyCancerGenome: not present;CancerHotspot: no;3DHotspot: no	MutationAssessor: impact: neutral, score: 0.695;SIFT: impact: tolerated_low_confidence, score: 0.11;Polyphen-2: impact: benign, score: 0.007	Missense_Mutation	SNP	diploid		8	104384015	104384015	A	G	8:g.104384015A>G	ENST00000330295.5:c.131A>G	0.24		34	107		84	225	44200
Liver Hepatocellular Carcinoma (TCGA, PanCancer Atlas)	TCGA-4R-AA8I-01	Hepatocellular Carcinoma	D210V	OncoKB: NA;CIViC: NA;MyCancerGenome: not present;CancerHotspot: no;3DHotspot: no	MutationAssessor: impact: medium, score: 2.215;SIFT: impact: deleterious, score: 0.01;Polyphen-2: impact: probably_damaging, score: 0.997	Missense_Mutation	SNP	diploid		8	104394725	104394725	A	T	8:g.104394725A>T	ENST00000330295.5:c.629A>T	0.39		44	68		142	1057	44290
Prostate Adenocarcinoma (TCGA, PanCancer Atlas)	TCGA-XK-AAIW-01	Prostate Adenocarcinoma	L114S	OncoKB: NA;CIViC: NA;MyCancerGenome: not present;CancerHotspot: no;3DHotspot: no	MutationAssessor: impact: medium, score: 2.42;SIFT: impact: deleterious, score: 0.04;Polyphen-2: impact: possibly_damaging, score: 0.63	Missense_Mutation	SNP	diploid		8	104388156	104388156	T	C	8:g.104388156T>C	ENST00000330295.5:c.341T>C	0.29		6	15		27	6234	44231
Uterine Corpus Endometrial Carcinoma (TCGA, PanCancer Atlas)	TCGA-D1-A16X-01	Uterine Endometrioid Carcinoma	A124V	OncoKB: NA;CIViC: NA;MyCancerGenome: not present;CancerHotspot: no;3DHotspot: no	MutationAssessor: impact: neutral, score: 0.66;SIFT: impact: tolerated, score: 0.61;Polyphen-2: impact: benign, score: 0.122	Missense_Mutation	SNP	diploid	3	8	104388186	104388186	C	T	8:g.104388186C>T	ENST00000330295.5:c.371C>T	0.2		15	59		66	2725	44231
Uterine Corpus Endometrial Carcinoma (TCGA, PanCancer Atlas)	TCGA-BS-A0UL-01	Uterine Endometrioid Carcinoma	D119Y	OncoKB: NA;CIViC: NA;MyCancerGenome: not present;CancerHotspot: no;3DHotspot: no	MutationAssessor: impact: medium, score: 2.67;SIFT: impact: deleterious, score: 0;Polyphen-2: impact: probably_damaging, score: 0.956	Missense_Mutation	SNP	diploid	1	8	104388170	104388170	G	T	8:g.104388170G>T	ENST00000330295.5:c.355G>T	0.16		9	47		89	388	44231
Uterine Corpus Endometrial Carcinoma (TCGA, PanCancer Atlas)	TCGA-BS-A0UV-01	Uterine Endometrioid Carcinoma	M185I	OncoKB: NA;CIViC: NA;MyCancerGenome: not present;CancerHotspot: no;3DHotspot: no	MutationAssessor: impact: neutral, score: 0.55;SIFT: impact: tolerated, score: 0.07;Polyphen-2: impact: benign, score: 0	Missense_Mutation	SNP	gain	1	8	104390437	104390437	G	T	8:g.104390437G>T	ENST00000330295.5:c.555G>T	0.16		31	162		250	8968	44259
Uterine Corpus Endometrial Carcinoma (TCGA, PanCancer Atlas)	TCGA-AP-A1DV-01	Uterine Endometrioid Carcinoma	R132H	OncoKB: NA;CIViC: NA;MyCancerGenome: not present;CancerHotspot: no;3DHotspot: no	MutationAssessor: impact: low, score: 1.575;SIFT: impact: tolerated, score: 0.15;Polyphen-2: impact: possibly_damaging, score: 0.499	Missense_Mutation	SNP	diploid		8	104390277	104390277	G	A	8:g.104390277G>A	ENST00000330295.5:c.395G>A	0.33		13	27		36	12063	44259
Uterine Corpus Endometrial Carcinoma (TCGA, PanCancer Atlas)	TCGA-AJ-A3EL-01	Uterine Endometrioid Carcinoma	A174S	OncoKB: NA;CIViC: NA;MyCancerGenome: not present;CancerHotspot: no;3DHotspot: no	MutationAssessor: impact: neutral, score: 0.235;SIFT: impact: tolerated, score: 0.34;Polyphen-2: impact: benign, score: 0	Missense_Mutation	SNP	diploid		8	104390402	104390402	G	T	8:g.104390402G>T	ENST00000330295.5:c.520G>T	0.26		10	28		98	7385	44259
Uterine Corpus Endometrial Carcinoma (TCGA, PanCancer Atlas)	TCGA-AP-A059-01	Uterine Endometrioid Carcinoma	G199*	OncoKB: NA;CIViC: NA;MyCancerGenome: not present;CancerHotspot: no;3DHotspot: no	MutationAssessor: NA;SIFT: NA;Polyphen-2: NA	Nonsense_Mutation	SNP	diploid		8	104394691	104394691	G	T	8:g.104394691G>T	ENST00000330295.5:c.595G>T	0.17		73	352		750	10939	44290
Uterine Corpus Endometrial Carcinoma (TCGA, PanCancer Atlas)	TCGA-AP-A059-01	Uterine Endometrioid Carcinoma	L200F	OncoKB: NA;CIViC: NA;MyCancerGenome: not present;CancerHotspot: no;3DHotspot: no	MutationAssessor: impact: low, score: 1.935;SIFT: impact: deleterious, score: 0.01;Polyphen-2: impact: possibly_damaging, score: 0.741	Missense_Mutation	SNP	diploid		8	104394694	104394694	C	T	8:g.104394694C>T	ENST00000330295.5:c.598C>T	0.17		75	361		759	10939	44290
Uterine Corpus Endometrial Carcinoma (TCGA, PanCancer Atlas)	TCGA-AX-A1CE-01	Uterine Endometrioid Carcinoma	K130N	OncoKB: NA;CIViC: NA;MyCancerGenome: not present;CancerHotspot: no;3DHotspot: no	MutationAssessor: impact: medium, score: 2.775;SIFT: impact: deleterious, score: 0;Polyphen-2: impact: probably_damaging, score: 0.994	Missense_Mutation	SNP	diploid		8	104390272	104390272	G	T	8:g.104390272G>T	ENST00000330295.5:c.390G>T	0.17		10	50		65	11440	44259
Uterine Corpus Endometrial Carcinoma (TCGA, PanCancer Atlas)	TCGA-B5-A3FC-01	Uterine Endometrioid Carcinoma	E92Gfs*8	OncoKB: NA;CIViC: NA;MyCancerGenome: not present;CancerHotspot: no;3DHotspot: no	MutationAssessor: NA;SIFT: NA;Polyphen-2: NA	Frame_Shift_Ins	INS	diploid		8	104388080	104388081	-	A	8:g.104388080_104388081insA	ENST00000330295.5:c.269dup	0.26		24	68		62	12211	44231
Uterine Corpus Endometrial Carcinoma (TCGA, PanCancer Atlas)	TCGA-B5-A3FC-01	Uterine Endometrioid Carcinoma	C126Y	OncoKB: NA;CIViC: NA;MyCancerGenome: not present;CancerHotspot: no;3DHotspot: no	MutationAssessor: impact: medium, score: 2.775;SIFT: impact: deleterious, score: 0;Polyphen-2: impact: probably_damaging, score: 0.996	Missense_Mutation	SNP	diploid	1	8	104390259	104390259	G	A	8:g.104390259G>A	ENST00000330295.5:c.377G>A	0.43		19	25		36	12211	44259
Uterine Corpus Endometrial Carcinoma (TCGA, PanCancer Atlas)	TCGA-DI-A1BU-01	Uterine Mixed Endometrial Carcinoma	H192R	OncoKB: NA;CIViC: NA;MyCancerGenome: not present;CancerHotspot: no;3DHotspot: no	MutationAssessor: impact: medium, score: 2.74;SIFT: impact: deleterious, score: 0;Polyphen-2: impact: probably_damaging, score: 0.991	Missense_Mutation	SNP	diploid		8	104390457	104390457	A	G	8:g.104390457A>G	ENST00000330295.5:c.575A>G	0.4		21	31		32	7642	44259
Uterine Corpus Endometrial Carcinoma (TCGA, PanCancer Atlas)	TCGA-EO-A22R-01	Uterine Endometrioid Carcinoma	S182N	OncoKB: NA;CIViC: NA;MyCancerGenome: not present;CancerHotspot: no;3DHotspot: no	MutationAssessor: impact: low, score: 1.385;SIFT: impact: tolerated, score: 0.11;Polyphen-2: impact: probably_damaging, score: 0.954	Missense_Mutation	SNP	diploid		8	104390427	104390427	G	A	8:g.104390427G>A	ENST00000330295.5:c.545G>A	0.45		18	22		46	12771	44259
Uterine Corpus Endometrial Carcinoma (TCGA, PanCancer Atlas)	TCGA-EY-A215-01	Uterine Endometrioid Carcinoma	X124_splice	OncoKB: NA;CIViC: NA;MyCancerGenome: not present;CancerHotspot: no;3DHotspot: no	MutationAssessor: impact: , score: undefined;SIFT: NA;Polyphen-2: NA	Splice_Region	SNP	diploid		8	104388191	104388191	A	C	8:g.104388191A>C	ENST00000330295.5:c.372+4A>C	0.4		18	27		55	4650
Uterine Corpus Endometrial Carcinoma (TCGA, PanCancer Atlas)	TCGA-EY-A549-01	Uterine Endometrioid Carcinoma	R146Q	OncoKB: NA;CIViC: NA;MyCancerGenome: not present;CancerHotspot: no;3DHotspot: no	MutationAssessor: impact: medium, score: 2.155;SIFT: impact: deleterious, score: 0.03;Polyphen-2: impact: probably_damaging, score: 0.992	Missense_Mutation	SNP	gain	1	8	104390319	104390319	G	A	8:g.104390319G>A	ENST00000330295.5:c.437G>A	0.68	0.01	42	20	1	71	1319	44259
Uterine Corpus Endometrial Carcinoma (TCGA, PanCancer Atlas)	TCGA-SJ-A6ZI-01	Uterine Endometrioid Carcinoma	R193H	OncoKB: NA;CIViC: NA;MyCancerGenome: not present;CancerHotspot: no;3DHotspot: no	MutationAssessor: impact: medium, score: 2.705;SIFT: impact: deleterious, score: 0;Polyphen-2: impact: probably_damaging, score: 0.996	Missense_Mutation	SNP	diploid	2	8	104390460	104390460	G	A	8:g.104390460G>A	ENST00000330295.5:c.578G>A	0.18		7	31		41	1307	44259
Lung Adenocarcinoma (TCGA, PanCancer Atlas)	TCGA-78-7166-01	Lung Adenocarcinoma	W102R	OncoKB: NA;CIViC: NA;MyCancerGenome: not present;CancerHotspot: no;3DHotspot: no	MutationAssessor: impact: medium, score: 1.95;SIFT: impact: tolerated, score: 0.2;Polyphen-2: impact: possibly_damaging, score: 0.741	Missense_Mutation	SNP	diploid	1	8	104388119	104388119	T	C	8:g.104388119T>C	ENST00000330295.5:c.304T>C	0.32		14	30		72	194	44231
Skin Cutaneous Melanoma (TCGA, PanCancer Atlas)	TCGA-GN-A4U8-06	Cutaneous Melanoma	P75S	OncoKB: NA;CIViC: NA;MyCancerGenome: not present;CancerHotspot: no;3DHotspot: no	MutationAssessor: impact: medium, score: 2.73;SIFT: impact: deleterious, score: 0.01;Polyphen-2: impact: probably_damaging, score: 0.999	Missense_Mutation	SNP	amp	1	8	104388038	104388038	C	T	8:g.104388038C>T	ENST00000330295.5:c.223C>T	0.16		44	224		84	340	44231
Skin Cutaneous Melanoma (TCGA, PanCancer Atlas)	TCGA-D3-A51R-06	Cutaneous Melanoma	R65Q	OncoKB: NA;CIViC: NA;MyCancerGenome: not present;CancerHotspot: no;3DHotspot: no	MutationAssessor: impact: low, score: 1.37;SIFT: impact: tolerated, score: 0.21;Polyphen-2: impact: probably_damaging, score: 0.992	Missense_Mutation	SNP	diploid	1	8	104388009	104388009	G	A	8:g.104388009G>A	ENST00000330295.5:c.194G>A	0.39		31	48		80	592	44231
Stomach Adenocarcinoma (TCGA, PanCancer Atlas)	TCGA-F1-6177-01	Stomach Adenocarcinoma	P75L	OncoKB: NA;CIViC: NA;MyCancerGenome: not present;CancerHotspot: no;3DHotspot: no	MutationAssessor: impact: medium, score: 3.11;SIFT: impact: deleterious, score: 0.05;Polyphen-2: impact: probably_damaging, score: 0.999	Missense_Mutation	SNP	gain	1	8	104388039	104388039	C	T	8:g.104388039C>T	ENST00000330295.5:c.224C>T	0.26		49	141		144	1198	44231
Stomach Adenocarcinoma (TCGA, PanCancer Atlas)	TCGA-CD-8536-01	Stomach Adenocarcinoma	G73D	OncoKB: NA;CIViC: NA;MyCancerGenome: not present;CancerHotspot: no;3DHotspot: no	MutationAssessor: impact: high, score: 4.41;SIFT: impact: deleterious, score: 0;Polyphen-2: impact: probably_damaging, score: 1	Missense_Mutation	SNP	gain	1	8	104388033	104388033	G	A	8:g.104388033G>A	ENST00000330295.5:c.218G>A	0.16		42	219		180	838	44231
Pancreatic Adenocarcinoma (TCGA, PanCancer Atlas)	TCGA-IB-7651-01	Pancreatic Adenocarcinoma	X51_splice	OncoKB: NA;CIViC: NA;MyCancerGenome: not present;CancerHotspot: no;3DHotspot: no	MutationAssessor: impact: , score: undefined;SIFT: NA;Polyphen-2: NA	Splice_Site	SNP	diploid		8	104387965	104387965	G	A	8:g.104387965G>A	ENST00000330295.5:c.151-1G>A	0.16		116	589		107	14306
Colorectal Adenocarcinoma (TCGA, PanCancer Atlas)	TCGA-AA-3977-01	Colon Adenocarcinoma	R235H	OncoKB: NA;CIViC: NA;MyCancerGenome: not present;CancerHotspot: no;3DHotspot: no	MutationAssessor: impact: medium, score: 2.33;SIFT: impact: deleterious, score: 0;Polyphen-2: impact: probably_damaging, score: 0.996	Missense_Mutation	SNP	diploid	1	8	104394800	104394800	G	A	8:g.104394800G>A	ENST00000330295.5:c.704G>A	0.37		92	155		333	3450	44290
Colorectal Adenocarcinoma (TCGA, PanCancer Atlas)	TCGA-AA-A00N-01	Mucinous Adenocarcinoma of the Colon and Rectum	A124V	OncoKB: NA;CIViC: NA;MyCancerGenome: not present;CancerHotspot: no;3DHotspot: no	MutationAssessor: impact: neutral, score: 0.66;SIFT: impact: tolerated, score: 0.61;Polyphen-2: impact: benign, score: 0.122	Missense_Mutation	SNP	diploid	3	8	104388186	104388186	C	T	8:g.104388186C>T	ENST00000330295.5:c.371C>T	0.13	0.0049	12	83	1	205	4869	44231
Colorectal Adenocarcinoma (TCGA, PanCancer Atlas)	TCGA-AA-A00N-01	Mucinous Adenocarcinoma of the Colon and Rectum	E240*	OncoKB: NA;CIViC: NA;MyCancerGenome: not present;CancerHotspot: no;3DHotspot: no	MutationAssessor: NA;SIFT: NA;Polyphen-2: NA	Nonsense_Mutation	SNP	diploid	1	8	104394814	104394814	G	T	8:g.104394814G>T	ENST00000330295.5:c.718G>T	0.27		55	151		232	4869	44290
Colorectal Adenocarcinoma (TCGA, PanCancer Atlas)	TCGA-AA-A010-01	Colon Adenocarcinoma	R193C	OncoKB: NA;CIViC: NA;MyCancerGenome: not present;CancerHotspot: no;3DHotspot: no	MutationAssessor: impact: medium, score: 2.705;SIFT: impact: deleterious, score: 0;Polyphen-2: impact: probably_damaging, score: 0.996	Missense_Mutation	SNP	diploid	2	8	104390459	104390459	C	T	8:g.104390459C>T	ENST00000330295.5:c.577C>T	0.54		20	17		21	7496	44259
Colorectal Adenocarcinoma (TCGA, PanCancer Atlas)	TCGA-AG-A002-01	Rectal Adenocarcinoma	R150K	OncoKB: NA;CIViC: NA;MyCancerGenome: not present;CancerHotspot: no;3DHotspot: no	MutationAssessor: impact: neutral, score: -0.795;SIFT: impact: tolerated, score: 1;Polyphen-2: impact: benign, score: 0	Missense_Mutation	SNP	diploid	1	8	104390331	104390331	G	A	8:g.104390331G>A	ENST00000330295.5:c.449G>A	0.39		87	137		176	11431	44259
Head and Neck Squamous Cell Carcinoma (TCGA, PanCancer Atlas)	TCGA-CN-6012-01	Head and Neck Squamous Cell Carcinoma	S219*	OncoKB: NA;CIViC: NA;MyCancerGenome: not present;CancerHotspot: no;3DHotspot: no	MutationAssessor: NA;SIFT: NA;Polyphen-2: NA	Nonsense_Mutation	SNP	gain		8	104394752	104394752	C	G	8:g.104394752C>G	ENST00000330295.5:c.656C>G	0.07		13	165		172	109	44290
Cervical Squamous Cell Carcinoma (TCGA, PanCancer Atlas)	TCGA-VS-A9UM-01	Cervical Squamous Cell Carcinoma	S195F	OncoKB: NA;CIViC: NA;MyCancerGenome: not present;CancerHotspot: no;3DHotspot: no	MutationAssessor: impact: medium, score: 2.295;SIFT: impact: deleterious, score: 0.01;Polyphen-2: impact: possibly_damaging, score: 0.459	Missense_Mutation	SNP	gain		8	104390466	104390466	C	T	8:g.104390466C>T	ENST00000330295.5:c.584C>T	0.57		32	24		53	59	44259
